# Supplementary material for: Feasibility of Muscle Endurance Testing in Critically Ill Trauma Patients: A Pilot Study
Source: MDPI journal article supplement (doi:10.3390/healthcare11010053), 2022-12-24
Supplement: s1 [file s1]

## Safety Criteria for Early Mobilization in ICU

|        |  |      |  |     |  |      |  |
|--------|--|------|--|-----|--|------|--|
| Number |  | Name |  | Sex |  | Date |  |
|--------|--|------|--|-----|--|------|--|

|                               |                               |
|-------------------------------|-------------------------------|
| PASS <input type="checkbox"/> | FAIL <input type="checkbox"/> |
|-------------------------------|-------------------------------|

| System                                                                                                                                                                                                                                                                                                                                                                                                                                                                                                                                                                                                                                                                                               | Screening Item                                                                                                                                                                                                                                                                                                                                                                                                                                                                                                                                                                                                                                                                                                                                                                                                                                                                                                                                                                                                                        |
|------------------------------------------------------------------------------------------------------------------------------------------------------------------------------------------------------------------------------------------------------------------------------------------------------------------------------------------------------------------------------------------------------------------------------------------------------------------------------------------------------------------------------------------------------------------------------------------------------------------------------------------------------------------------------------------------------|---------------------------------------------------------------------------------------------------------------------------------------------------------------------------------------------------------------------------------------------------------------------------------------------------------------------------------------------------------------------------------------------------------------------------------------------------------------------------------------------------------------------------------------------------------------------------------------------------------------------------------------------------------------------------------------------------------------------------------------------------------------------------------------------------------------------------------------------------------------------------------------------------------------------------------------------------------------------------------------------------------------------------------------|
| Cardiovascular                                                                                                                                                                                                                                                                                                                                                                                                                                                                                                                                                                                                                                                                                       | <div style="display: flex; justify-content: space-between;"> <div style="width: 60%;"> <input type="checkbox"/> SBP &lt; 90mmHg or SBP &gt; 180mmHg<br/> <input type="checkbox"/> MBP &lt; 60mmHg or MBP &gt; 110mmHg<br/> <input type="checkbox"/> HR &lt; 50bpm or HR &gt; 130bpm<br/> <input type="checkbox"/> New or symptomatic arrhythmia, MI<br/> <input type="checkbox"/> PTE (discuss with MD to determine suitability)<br/> <input type="checkbox"/> DVT (may mobilize as tolerated immediately after LMWH is given)<br/> <input type="checkbox"/> Platelet count &lt; 20,000/uL                 </div> <div style="width: 35%;">                     &lt; Vasoactive agent &gt;<br/>                     : new vasoactive agent, use of three or more agents or frequent increases<br/> <input type="checkbox"/> Dopamine    <input type="checkbox"/> Norepinephrine<br/> <input type="checkbox"/> Vasopressin    <input type="checkbox"/> Epinephrine<br/> <input type="checkbox"/> Other :                 </div> </div> |
| Respiratory                                                                                                                                                                                                                                                                                                                                                                                                                                                                                                                                                                                                                                                                                          | <div style="display: flex; justify-content: space-between;"> <div style="width: 45%;"> <input type="checkbox"/> RR ≤ 5 or RR ≥ 40breaths/min<br/> <input type="checkbox"/> Airway is not adequately secured                 </div> <div style="width: 55%;"> <input type="checkbox"/> SpO<sub>2</sub> ≤ 88%    <input type="checkbox"/> FiO<sub>2</sub> ≥ 0.6    <input type="checkbox"/> PEEP &gt; 10mmHg                 </div> </div>                                                                                                                                                                                                                                                                                                                                                                                                                                                                                                                                                                                              |
| Neurologic                                                                                                                                                                                                                                                                                                                                                                                                                                                                                                                                                                                                                                                                                           | <div style="display: flex; justify-content: space-between;"> <div style="width: 45%;"> <input type="checkbox"/> Severe agitation, stress state<br/> <input type="checkbox"/> ICP ≥ 20mmHg                 </div> <div style="width: 55%;"> <input type="checkbox"/> Attention required for increased intraocular pressure<br/> <input type="checkbox"/> Unstable spinal injury or lesion    <input type="checkbox"/> CSF leakage or lumbar drain                 </div> </div>                                                                                                                                                                                                                                                                                                                                                                                                                                                                                                                                                        |
| Other                                                                                                                                                                                                                                                                                                                                                                                                                                                                                                                                                                                                                                                                                                | <input type="checkbox"/> BT ≥ 38°C <input type="checkbox"/> Active or uncontrolled bleeding <input type="checkbox"/> Unstable fracture <input type="checkbox"/> Open abdomen                                                                                                                                                                                                                                                                                                                                                                                                                                                                                                                                                                                                                                                                                                                                                                                                                                                          |
| *the cited values are not absolute criteria for withholding mobilization or chest physiotherapy. It may be modified according to the medical condition of the critically ill patient.                                                                                                                                                                                                                                                                                                                                                                                                                                                                                                                |                                                                                                                                                                                                                                                                                                                                                                                                                                                                                                                                                                                                                                                                                                                                                                                                                                                                                                                                                                                                                                       |
| <b>Stop Criteria</b>                                                                                                                                                                                                                                                                                                                                                                                                                                                                                                                                                                                                                                                                                 |                                                                                                                                                                                                                                                                                                                                                                                                                                                                                                                                                                                                                                                                                                                                                                                                                                                                                                                                                                                                                                       |
| <div style="display: flex; flex-wrap: wrap;"> <div style="width: 50%;"> <input type="checkbox"/> Abnormalities in the above-mentioned vital signs occur. (If it is not stabilized even after stopping mobilization.)<br/> <input type="checkbox"/> Changes in consciousness<br/> <input type="checkbox"/> Ventilator asynchrony<br/> <input type="checkbox"/> Bleeding<br/> <input type="checkbox"/> Distress reported by patient or observed by clinician                 </div> <div style="width: 50%;"> <input type="checkbox"/> New/symptomatic arrhythmia<br/> <input type="checkbox"/> Fall<br/> <input type="checkbox"/> Medical device removal or malfunction                 </div> </div> |                                                                                                                                                                                                                                                                                                                                                                                                                                                                                                                                                                                                                                                                                                                                                                                                                                                                                                                                                                                                                                       |

**Safety Fail Event :** *(comment field)*
